# Supplementary material for: Synthesis and properties of an efficient and switchable photosensitizing unit, [Ru(4,4′-diphenyl-2,2′-bipyridine)2(7-amino-dipyrido[3,2-a:2′,3′-c]phenazine)]2+, for a photo-induced energy transfer systemElectronic supplementary information (ESI) available: time-resolved emission decay curves of Ru(Ph)-NHCO-Os and Ru-NHCO-Os. See http://www.rsc.org/suppdata/dt/b2/b211225f/
Source: Royal Society of Chemistry journal article supplement (doi:10.1039/b211225f), 2003-01-30
Supplement: b211225f.pdf [file b211225f.pdf]

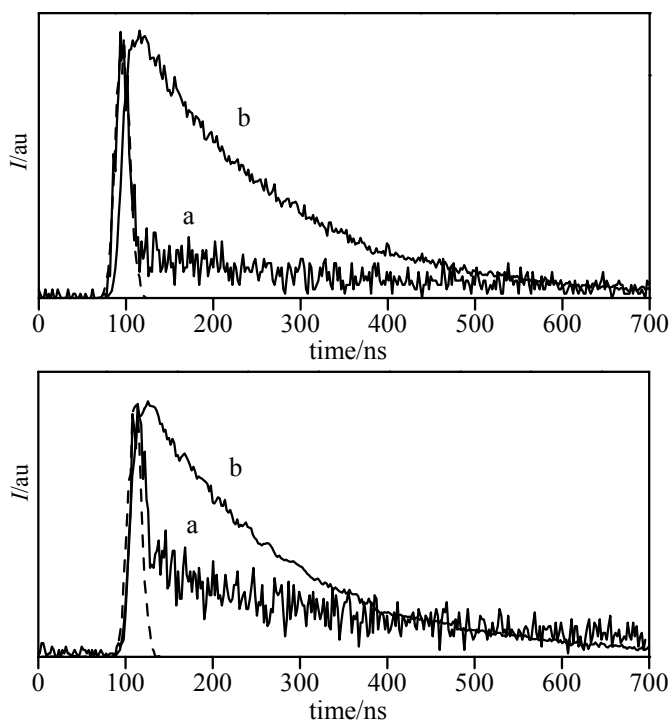

Time-resolved emission decay curves of **Ru(Ph)-NHCO-Os** (top) and **Ru-NHCO-Os** (bottom), as measured at 620 nm (a, Ru-based) and 740 nm (b, Os-based), by irradiation of sample solutions in N<sub>2</sub>-purged acetonitrile (ca. 10<sup>-4</sup>M) with a nitrogen laser pulse (Hamamatsu Photonics LN120C2, 337nm) through a coumarin chromophore (447nm). The emission was then dispersed with a Hamamatsu Photonics C-2830 disperser and monitored on Hamamatsu Photonics M-2548 streak camera. Each dashed line represents laser pulse.

T. Akasaka *et al.*, Electronic Supplementary Information
